# Supplementary material for: α-MoC1−x nanorods as an efficient hydrogen evolution reaction electrocatalyst
Source: Royal Society of Chemistry journal article supplement (doi:10.1039/d1nj01088c), 2021-01-01
Supplement: d1nj01088c1.pdf [file d1nj01088c1.pdf]

## $\alpha$ -MoC<sub>1-x</sub> Nanorods as Efficient Hydrogen Evolution Reaction

### Electrocatalyst

Punian Yin,<sup>a, †</sup> Huizhu Cai,<sup>a, †</sup> Xiao Zhang,<sup>a</sup> Bingbing Chen,<sup>a</sup> Yang Liu,<sup>a</sup> Rui Gao,  
\*\*b, c, d Chuan Shi,<sup>\*a</sup>

<sup>a</sup> State Key Laboratory of Fine Chemicals, School of Chemical Engineering, Dalian University of Technology, Dalian 116024, China.

<sup>b</sup> State Key Laboratory of Coal Conversion, Institute of Coal Chemistry, Chinese Academy of Sciences, Post Office Box 165, Taiyuan, Shanxi 030001, China

<sup>c</sup> Beijing Advanced Innovation Center for Materials Genome Engineering, Beijing, China.

<sup>d</sup> School of Chemistry and Chemical Engineering, Inner Mongolia University, Hohhot, China.

† These authors contributed equally to this work.

\* Corresponding author.

E-mail addresses: chuanshi@dlut.edu.cn (Chuan Shi)

\*\* Corresponding author.

E-mail addresses: gaorui@imu.edu.cn (Rui Gao).

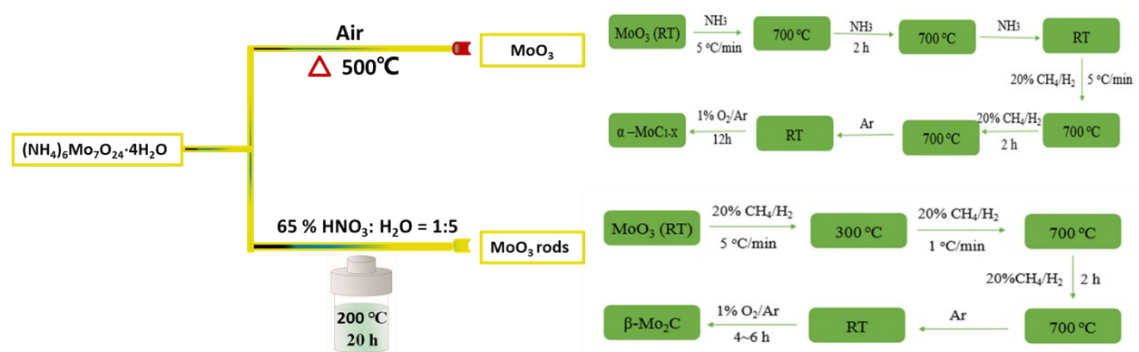

**Figure S1** Schematic explanation of the synthetic procedure of the molybdenum carbide-based catalysts.

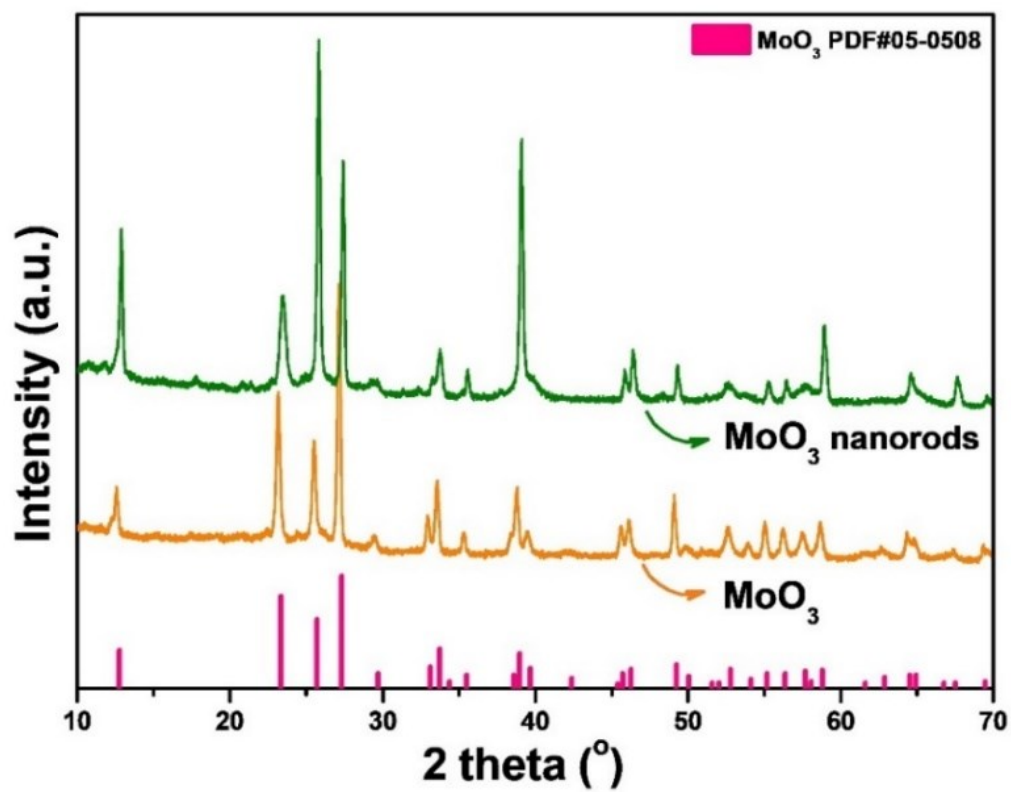

Figure S2 XRD patterns of MoO<sub>3</sub> and MoO<sub>3</sub> nanorods.

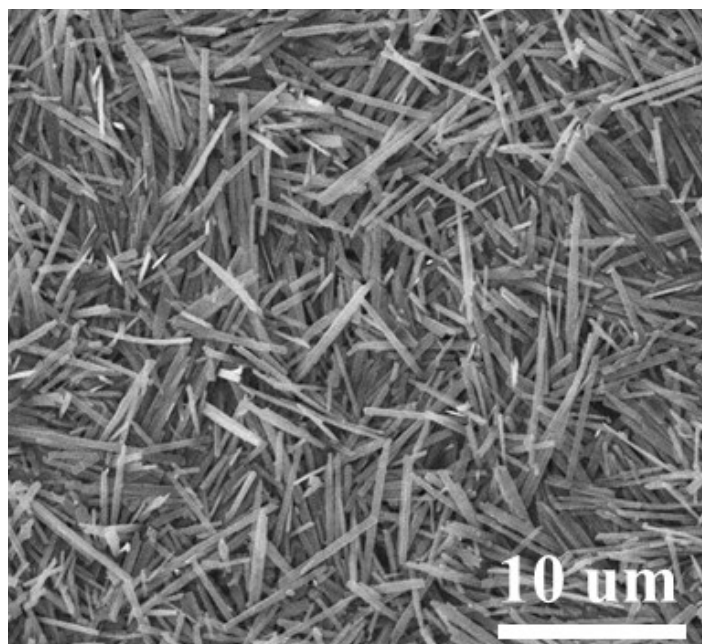

**Figure S3** Scanning electron microscopy (SEM) images of MoO<sub>3</sub> nanorods.

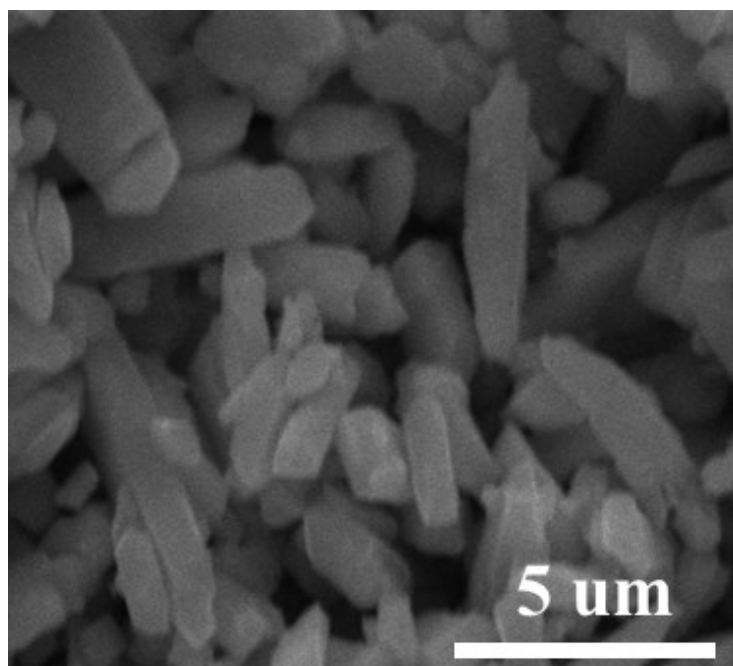

**Figure S4** Scanning electron microscopy (SEM) images of MoO<sub>3</sub>.

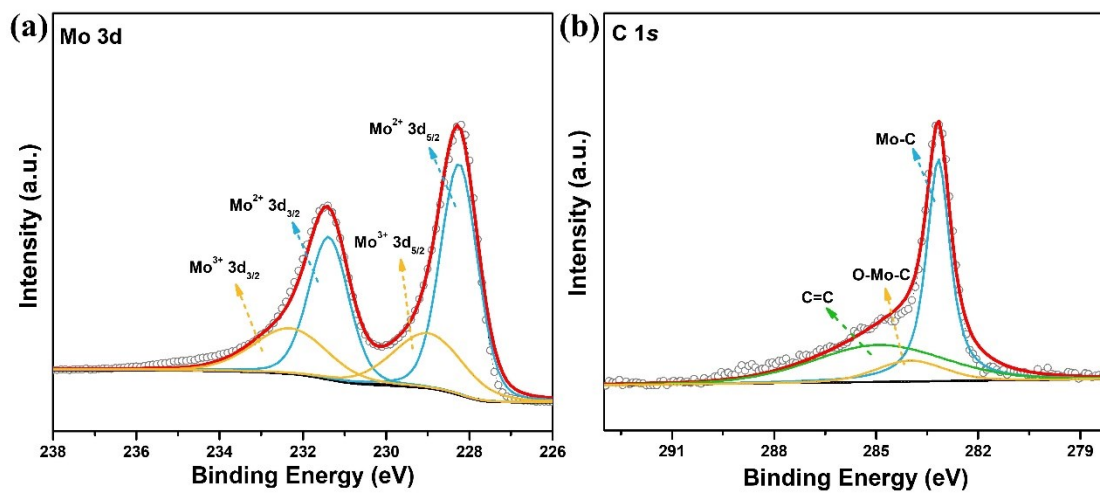

**Figure S5** XPS spectra for Mo 3d (a), C 1s (b) of  $\alpha$ - $\text{MoC}_{1-x}$  nanorods catalyst.

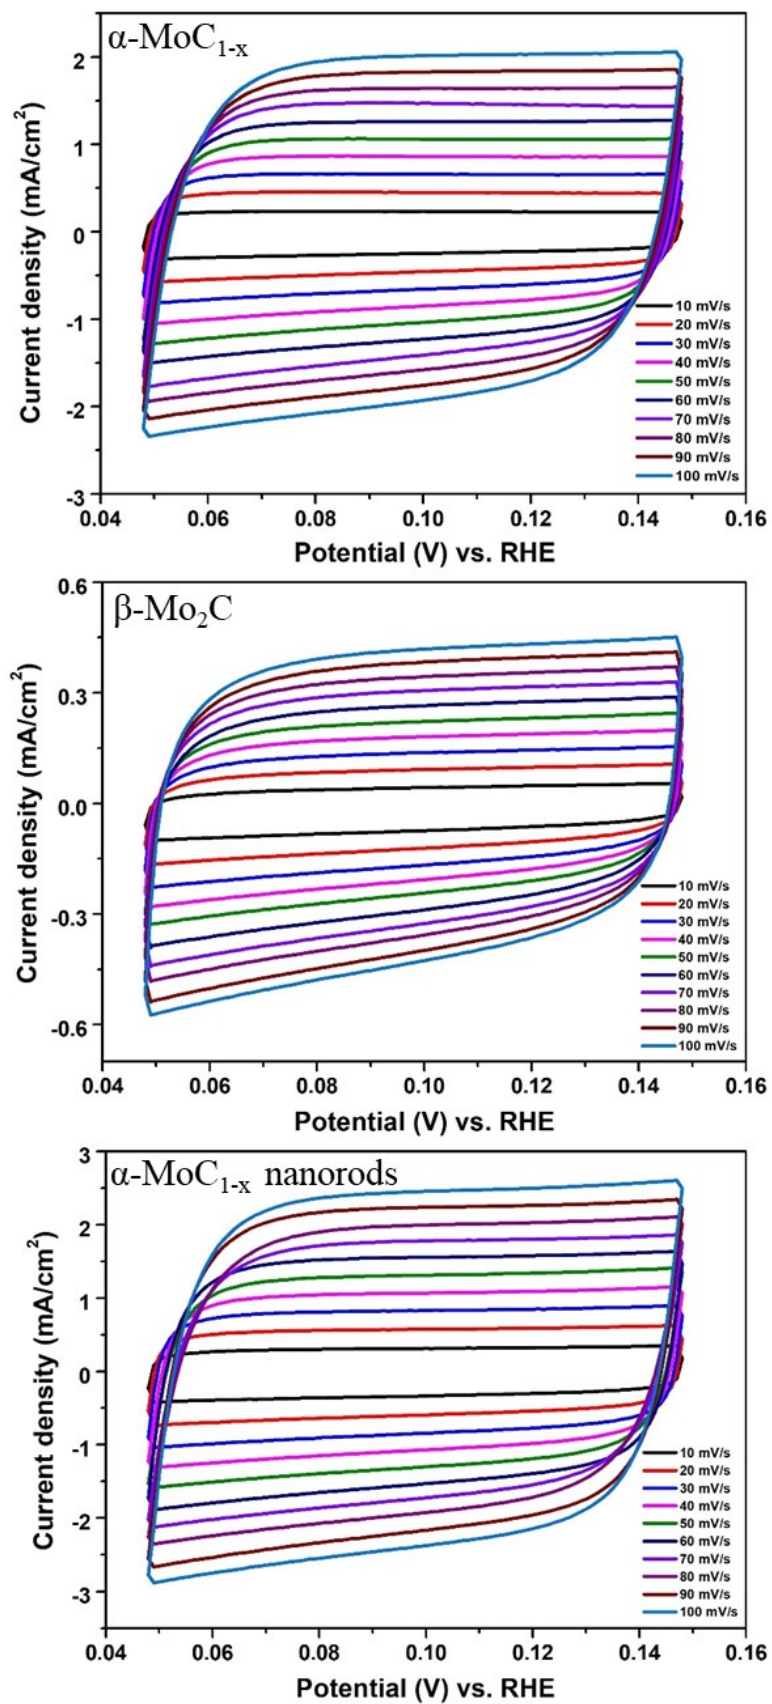

**Figure S6** Cyclic voltammograms of  $\alpha\text{-MoC}_{1-x}$ ,  $\beta\text{-Mo}_2\text{C}$  and  $\alpha\text{-MoC}_{1-x}$  nanorods with various scan rates in 0.5 M H<sub>2</sub>SO<sub>4</sub>.

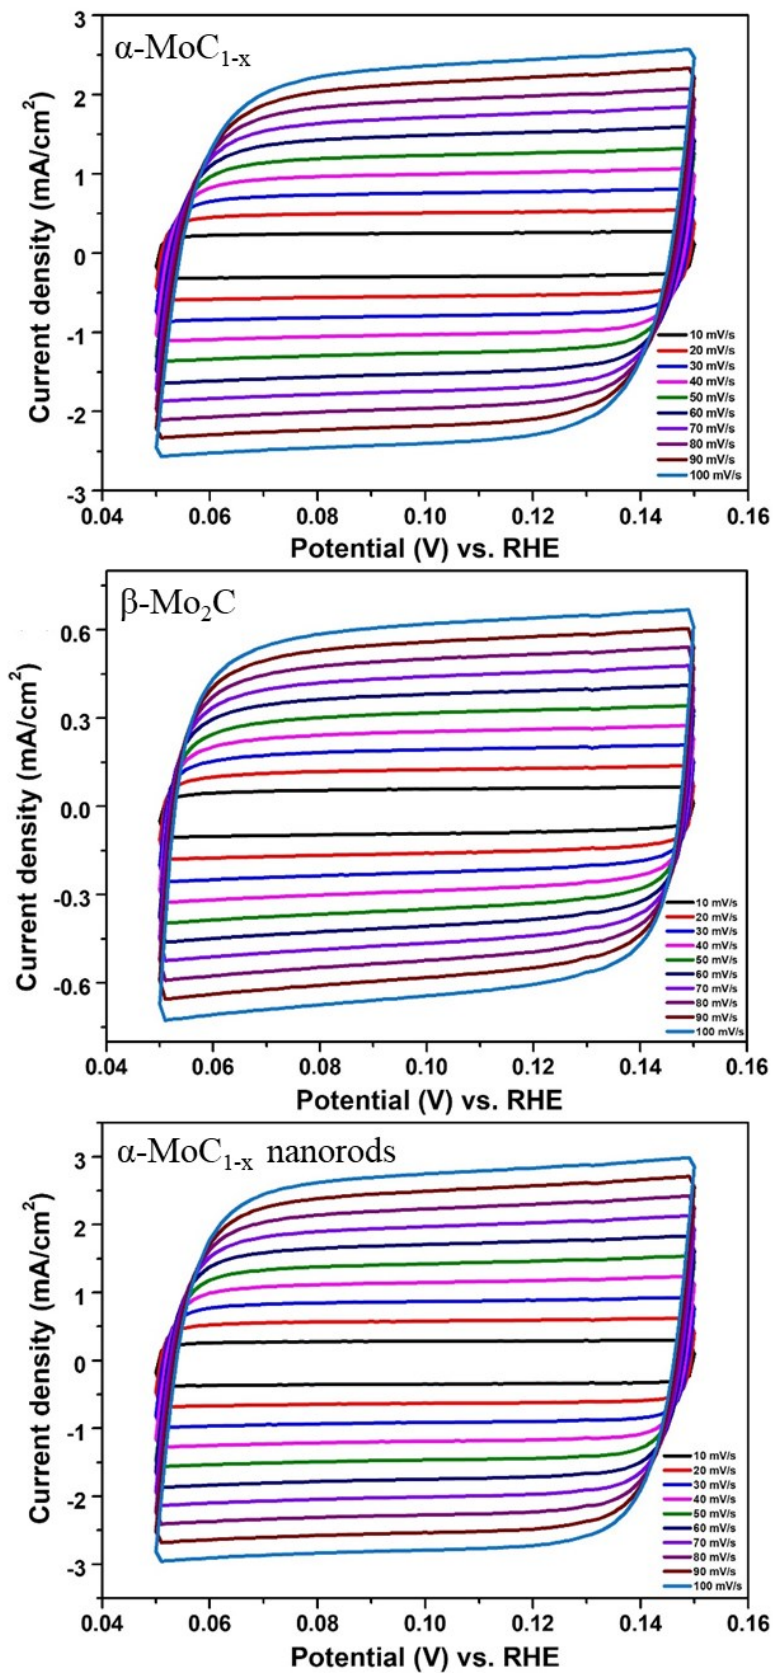

**Figure S7** Cyclic voltammograms of  $\alpha\text{-MoC}_{1-x}$ ,  $\beta\text{-Mo}_2\text{C}$  and  $\alpha\text{-MoC}_{1-x}$  nanorods with various scan rates in 1.0 M KOH.



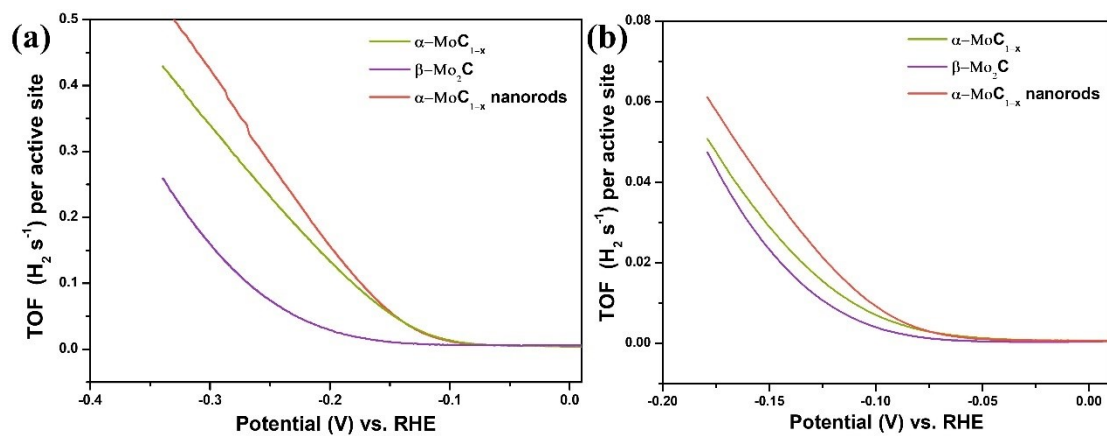

**Figure S8** The TOF values of  $\alpha\text{-MoC}_{1-x}$ ,  $\beta\text{-Mo}_2\text{C}$  and  $\alpha\text{-MoC}_{1-x}$  nanorods catalysts in (a)  $0.5 \text{ M H}_2\text{SO}_4$  and (b)  $1.0 \text{ M KOH}$  solution.

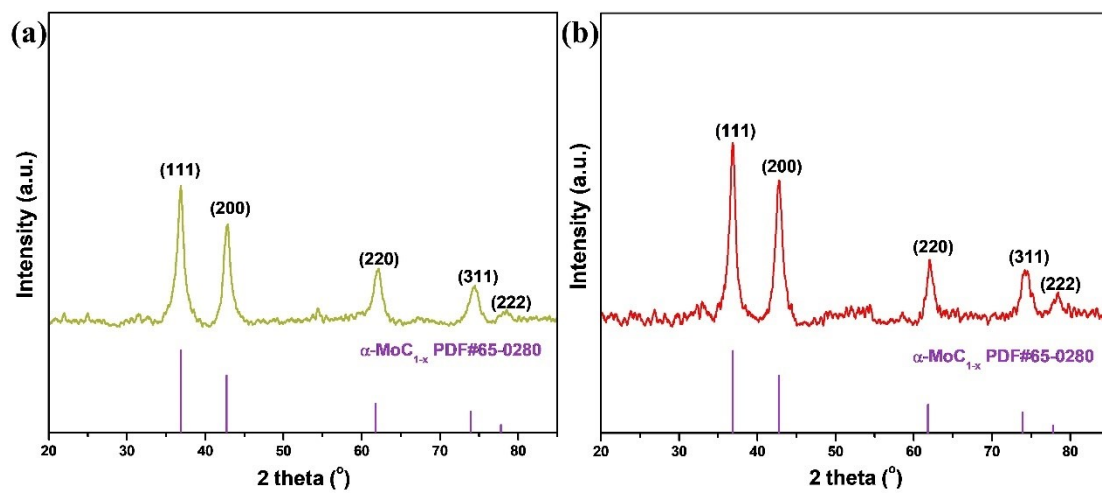

**Figure S9** The XRD patterns of  $\alpha\text{-MoC}_{1-x}$  nanorods catalyst after stability tests for HER in (a) 0.5 M  $\text{H}_2\text{SO}_4$  and (b) 1.0 M KOH solution.

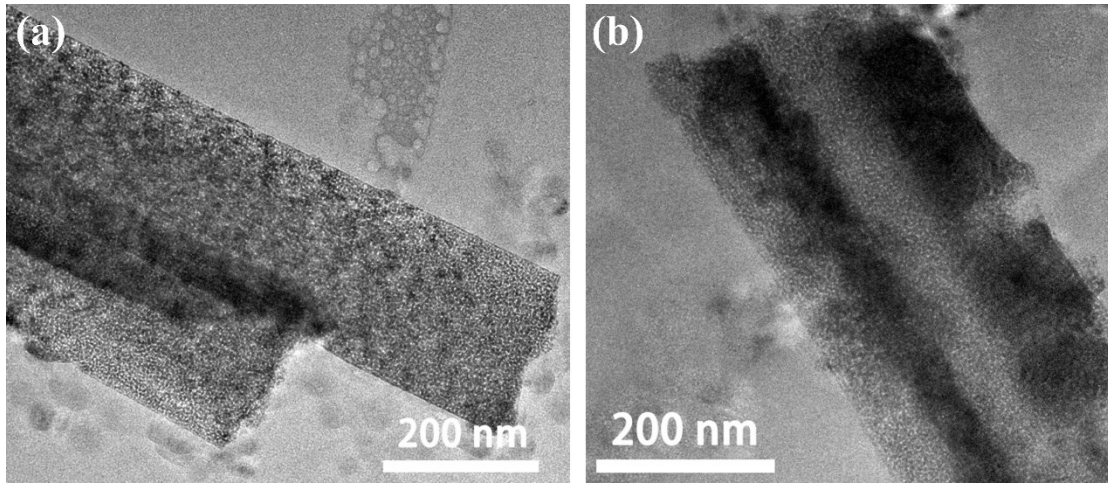

**Figure S10** The TEM images of  $\alpha$ - $\text{MoC}_{1-x}$  nanorods catalyst after stability tests for HER in (a) 0.5 M  $\text{H}_2\text{SO}_4$  and (b) 1.0 M KOH solution.

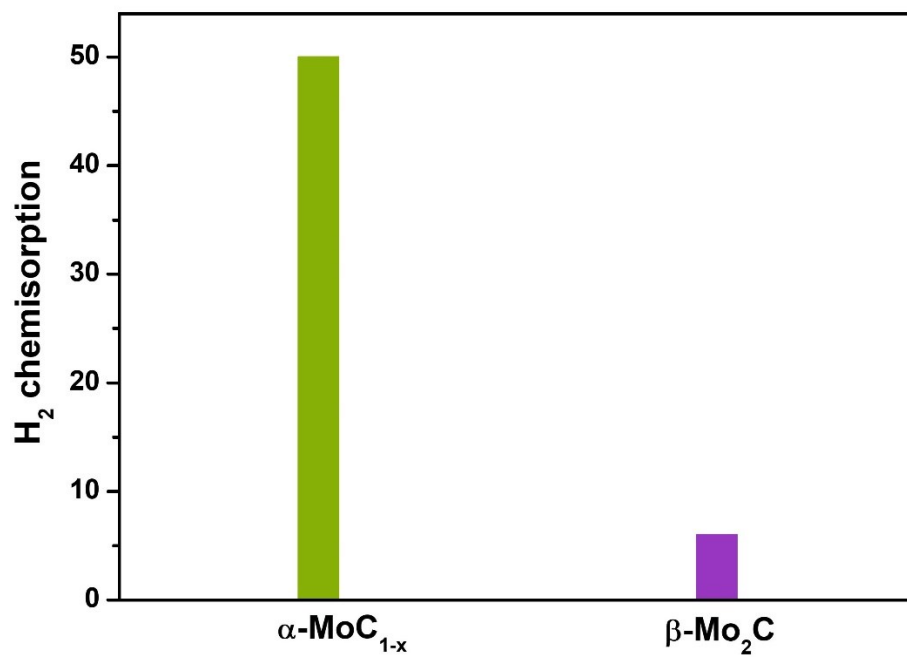

**Figure S11** H<sub>2</sub>-Chemisorption profiles of  $\alpha\text{-MoC}_{1-x}$  and  $\beta\text{-Mo}_2\text{C}$ .

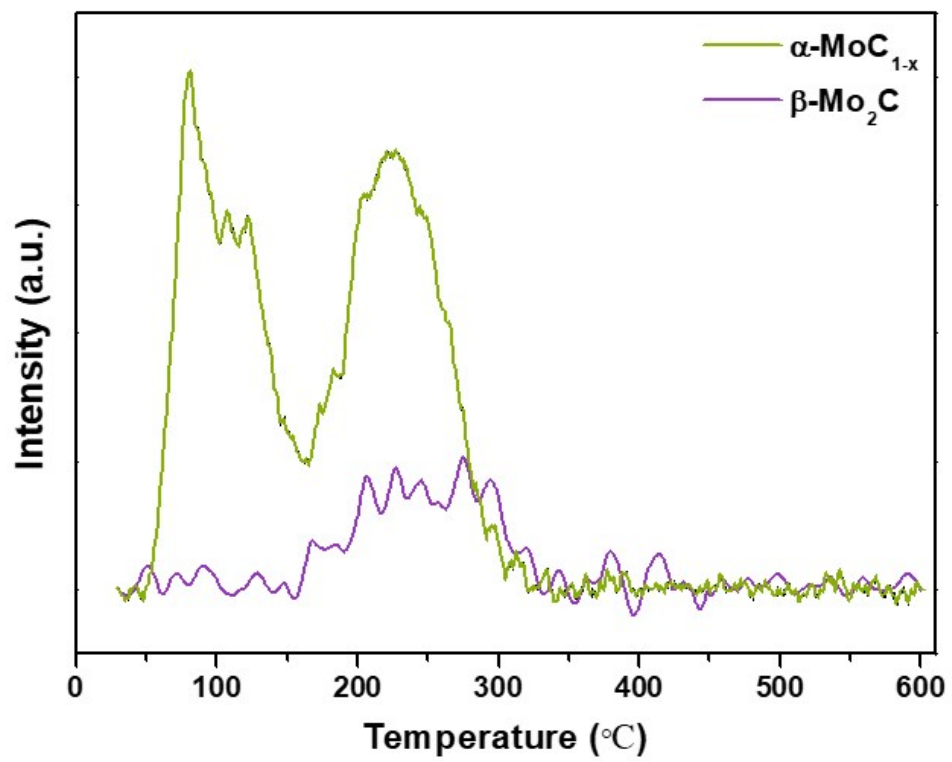

Figure S12 H<sub>2</sub>-TPD profiles of  $\alpha$ -MoC<sub>1-x</sub> and  $\beta$ -Mo<sub>2</sub>C.

**Table S1** Summary of representative  $\alpha$ - $\text{MoC}_{1-x}$ -based HER catalysts in 0.5 M  $\text{H}_2\text{SO}_4$ .

| Catalysts                                                   | j (mA/cm <sup>2</sup> ) | $\eta$ (mV) | Tafel slope | Ref       |
|-------------------------------------------------------------|-------------------------|-------------|-------------|-----------|
| $\text{Mo}_x\text{C-0.4}$                                   | 10                      | 48          | 155         | [1]       |
| $\text{MoC@C}$                                              | 10                      | 63.6        | 120         | [2]       |
| $\alpha$ - $\text{MoC}_{1-x}/\beta$ - $\text{Mo}_2\text{C}$ | 10                      | 78          | 242         | [3]       |
| $\alpha$ - $\text{MoC}_{1-x}$ - $\text{MoP/C}$              | 10                      | 57          | 173         | [4]       |
| $\alpha$ - $\text{MoC}_{1-x}$ nanorods                      | 10                      | 60          | 127         | This work |

**Table S2** ICP results of  $\alpha$ -MoC<sub>1-x</sub> nanorods before and after durability tests

|                       | Fresh sample | Used sample in 0.5 M<br>H <sub>2</sub> SO <sub>4</sub> | Used sample in 1.0 M<br>KOH |
|-----------------------|--------------|--------------------------------------------------------|-----------------------------|
| Mo content (wt.<br>%) | 46.7         | 44.9                                                   | 45.8                        |

## Calculated Electrochemically Active Surface Area

$$A_{\text{ECSA}} = \frac{\text{electrochemical capacitance}}{40 \mu\text{F cm}^{-2} \text{ per cm}_{\text{ECSA}}^2}$$

## Turnover Frequency Calculations

The turnover frequency can be calculated by the following formula:

$$\text{TOF} = \frac{\text{no. of total hydrogen turnovers/ cm}^2 \text{ of geometric area}}{\text{no. of active sites/ cm}^2 \text{ of geometric area}}$$

The total number of hydrogen turnovers per current density can be calculated by the formula:

$$\begin{aligned} \text{No. of H}_2 &= \left( \text{per} \frac{\text{mA}}{\text{cm}^2} \right) \left( \frac{1 \text{ C s}^{-1}}{1000 \text{ mA}} \right) \left( \frac{1 \text{ mol of e}}{96485.3 \text{ C}} \right) \left( \frac{1 \text{ mol of H}_2}{2 \text{ mol of e}} \right) \left( \frac{6.022 \times 10^{23} \text{ H}_2 \text{ molecules}}{1 \text{ mol of H}_2} \right) \\ &= 3.12 \times 10^{15} \frac{\text{H}_2 \text{ s}^{-1}}{\text{cm}^2} \text{ per} \frac{\text{mA}}{\text{cm}^2} \end{aligned}$$

## Active sites per real surface area:

For  $\alpha\text{-MoC}_{1-x}$

$$\text{active sites} = \left( \frac{8 \text{ atoms/unit cell}}{77.8 \text{ \AA}^3/\text{unit cell}} \right)^{\frac{2}{3}} = 2.19 \times 10^{15} \text{ atoms cm}_{\text{real}}^{-2}$$

For  $\beta\text{-Mo}_2\text{C}$

$$\text{active sites} = \left( \frac{2 \text{ atoms/unit cell}}{37.2 \text{ \AA}^3/\text{unit cell}} \right)^{\frac{2}{3}} = 1.42 \times 10^{15} \text{ atoms cm}_{\text{real}}^{-2}$$

**Finally, plot of current density can be converted into a TOF plot according to:**

$$\text{TOF} = \frac{\left( 3.12 \times 10^{15} \frac{\text{H}_2 \text{ s}^{-1}}{\text{cm}^2} \text{ per} \frac{\text{mA}}{\text{cm}^2} \right) \times |j|}{(\text{active sites per real surface area}) \times A_{\text{ECSA}}}$$



## References

- [1] X. Zhang, J. Wang, T. Guo, T. Liu, Z. Wu, L. Cavallo, Z. Cao, D. Wang, Structure and phase regulation in  $\text{Mo}_x\text{C}$  ( $\alpha\text{-MoC}_{1-x}/\beta\text{-Mo}_2\text{C}$ ) to enhance hydrogen evolution, *Appl. Catal. B: Environ.* 247 (2019) 78-85.
- [2] C. Lv, Z. Huang, Q. Yang, G. Wei, Z. Chen, M.G. Humphrey, C. Zhang, Ultrafast synthesis of molybdenum carbide nanoparticles for efficient hydrogen generation, *J. Mater. Chem. A* 5 (2017) 22805-22812.
- [3] T. Liu, X. Zhang, T. Guo, Z. Wu, D. Wang, Boosted hydrogen evolution from  $\alpha\text{-MoC}_{1-x}$ -MoP/C heterostructures, *Electrochim. Acta* 334 (2020) 135624.
- [4] Z. Chen, T. Guo, Z. Wu, D. Wang, Boron triggers the phase transformation of  $\text{Mo}_x\text{C}$  ( $\alpha\text{-MoC}_{1-x}/\beta\text{-Mo}_2\text{C}$ ) for enhanced hydrogen production, *Nanotechnology*, 31 (2019) 105707.
